# Supplementary material for: Effects of Simultaneously Performed Dual-Task Training with Aerobic Exercise and Working Memory Training on Cognitive Functions and Neural Systems in the Elderly
Source: Hindawi journal article supplement (doi:10.1155/2020/3859824), 2020-06-05
Supplement: f1 [file 3859824.f1.docx]

**Supplemental online material**

**Supplemental Methods.**

**Exclusion criteria of the subjects.**

Subjects with the following conditions were excluded from the study:

• myocardial infarction and/or coronary bypass surgery within the past year;

• uncontrolled diabetes or hypertension;

• orthopedic impairment or either an upper or lower extremity fracture within the past 6 months;

• dementia, excluded by 1/{1 + exp [−6.111 + 0.256 × Mini Mental State Examination (MMSE) score + 0.086 × Frontal Assessment Battery (FAB) score]} ≥ 0.4 (this criterion is shown to accurately screen dementia, but subjects with mild cognitive impairment may have been included in the study); [1];

• cigarette smoking;

• claustrophobia;

• history of psychiatric or neurological disease, as assessed using a routine questionnaire;

• presence of metals in the body; and

• previous participation in relevant studies.

Subjects who smoked cigarettes were excluded to select subjects without cardiovascular risk and to reduce variability in aerobic exercise capacity.

**Details of neuropsychological tests**

[A] Nonverbal reasoning. Nonverbal reasoning was assessed using Raven’s advanced progressive matrix [2]. The test contains 36 nonverbal items requiring fluid reasoning ability. Each item consists of a 3 × 3 matrix with a missing piece to be completed by selecting the best of 8 alternatives. The score of this test (number of correct answers in 30 min) was used as a psychometric index of individual intelligence. The Raven’s advanced progressive matrix was administered in a group setting in this study. The Raven’s advanced progressive matrix tests can be administered individually by a psychologist or trained test administrator, or administered on a group basis (Raven, 1998). The description of this task was reproduced from our previous study [3].

[B] Verbal WM. Verbal WM was tested by a digit span task. Digit Span, which has two subsections (DS-F and DS-B), evaluates short-term memory and working memory. Digit span forward measures short-term memory simply by requiring participants to repeat numbers. Digit span backward measures working memory by requiring participants to memorize numbers and to repeat the numbers in inverse order. For digit span forward, participants repeat numbers in the same order as they were read aloud by the examiner. For digit span backward, participants repeat numbers in the reverse order of that presented aloud by the examiner. In both, the examiner reads a series of number sequences which the examinee must repeat in either forward or reverse order. The primary measures of this test are sum of two tasks’ raw scores that reflect the number of correctly repeated sequences until the discontinue criterion (that is, failure to reproduce two sequences of equal length) is met. The descriptions of these tasks were reproduced from our previous study [4].

[D] Attention. Attention was measured by the digit cancellation task (D-CAT) [5]. The test sheet consists of 12 rows of 50 digits. Each row contains 5 sets of numbers 0 to 9 arranged in random order. Thus any one digit would appear 5 times in each row with randomly determined neighbors. D-CAT consists of three such sheets. Participants were instructed to search for the target number(s) that had been specified to them and to delete each one with a slash mark as fast and as accurately as possible until the experimenter sent a stop signal. There were 3 trials, first with a single target number (6), second with two target numbers (9 and 4), and third with three (8, 3, and 7). Each trial was given 1 minute, hence the total time required for D-CAT was 3 minutes. In the second and third trials, it was stressed that all of the target numbers instructed should be cancelled without omission. The descriptions of these tasks were reproduced from our previous study [4]. For this measure, we used the mean number of successfully cancelled items from the three trials.

[F] Processing speed. Processing speed was evaluated by the Symbol Search [6] and Digit Symbol tasks [6].

Digit Symbol is a subtest of WAIS-III [6]. This test measures processing speed. For Digit Symbol, the participants are shown a series of symbols that are paired with numbers. Using a key, the participants draw each symbol under its corresponding number, within a 120 second time limit. The primary measure of this test is the number of correct answers.

Symbol Search is a subtest of WAIS-III [6]. This test measures processing speed. The Symbol Search contains 60 items. For this subtest, the participants visually scan two groups of symbols (a target group and a search group) and indicate if either of the target symbols matches any of the symbols in the search group. The participants respond to as many items as possible within a 120 second time limit. The primary measure of this test is the number of correct answers.

The descriptions of these tasks were reproduced from our previous study [4].

[G] Creativity measured by divergent thinking. The SA creativity test was employed to evaluate creativity [3, 7, 8]. The practice (and real) tasks are administered in the following order: (1) practice of the first task (2 min), (2) the first task (5 min), (3) practice of the second task (2 min), (4) the second task (5 min), (5) practice of the third task (2 min), and (6) the third task (5 min). Each task involves two questions. In total, the test takes 30 min. This test was administered in a group setting. The first task requires subjects to generate unique ways of using typical objects (e.g., “Other than reading, how can we use newspapers?” An example answer is “We can use them to wrap things.”). The second task requires subjects to imagine desirable functions of ordinary objects (e.g., “What are the characteristics of a good TV? Write down as many characteristics as possible.” An example answer is “A TV can receive broadcasts from all over the world.”). The third task requires subjects to imagine the consequences of “unimaginable things” happening (e.g., “What would happen if all the mice in the world disappeared?” An example answer is “The world would become more hygienic.”). Each task requires subjects to generate as many answers as possible. The S-A creativity test provides a total score, which was used in this study, as well as scores for the following dimensions of the creative process: (a) Fluency: Fluency is measured by the number of relevant responses to questions and is related to the ability to produce and consider several alternatives. Fluency scores are determined by the total number of questions answered after excluding inappropriate responses or responses that are difficult to understand. (b) Flexibility: Flexibility is the ability to produce responses from a wide perspective. Flexibility scores are determined by the sum of the (total) number of category types to which the responses are assigned based on a criteria table or an almost equivalent judgment. (c) Originality: Originality is the ability to produce ideas that differ from those of others. Originality scoring is based on the sum of idea categories that are weighted based on a criteria table or an almost equivalent judgment. (d) Elaboration: Elaboration is the ability to produce detailed ideas (Society for Creative Mind, 1969). Please refer to the appendix of our previous study [9] for a sample and the manner in which the tests were scored. In this study, the sum of the graded scores of the four dimensions was used for analysis. The description of this task was reproduced from our previous study [10].

[H] General cognitive functions. MMSE [11], the screening instrument most widely used for detecting cognitive impairment in older adults, was used to evaluate general cognition. MMSE is a 20-item instrument. The items of MMSE measure orientation for place and time, memory and attention, language skills, and visuospatial abilities. MMSE is scored from 0 to 30. Lower scores of MMSE indicate greater degrees of general cognitive dysfunction. The primary measure is the total score of this task (max = 30). The description of this task was reproduced from our previous study [4]. Because of an apparent ceiling effect, this task was not used for the assessment of training effects.

**Details of each training task.**

The specific tasks completed were as follows:

1) Devilish Calculations. This task was similar to an “operation N-back task” [12]. “*Generally in the N-back task, participants were asked to memorize a series of stimuli and their temporal order, update the list of recent items, and select the responses that corresponded to the previously observed stimuli, according to the N-back rule (N stimuli ago)*” [12]. In this task, the stimuli consisted of adding or subtracting a pair of numbers from 0 to 9, such as “1 + 4,” presented in a random sequence on the 3DS upper screen. The subjects were asked to memorize the answer to the presented addition or subtraction task, which was always between 0 and 9. They were then required to write down the answers that corresponded to N stimuli back in the 3DS lower screen. The task level (N) changed on the basis of each subject’s performance, as described below, and the length of the task changed on the basis of the level of the task. When the subject’s performance level was below 65%, the task level decreased. When the subject’s performance level was higher than 85%, the task level increased. Otherwise, the task level remained the same. There were fast and normal levels at each level of N. In the fast levels, the stimuli were presented approximately once every 1.5 s. In the normal levels, the stimuli were presented approximately once every 2 s. The task level increased from normal speed N to fast speed N, followed by normal speed N + 1, fast speed N + 1, and so on.

2) Devilish Pairs. This task was similar to Pelmanism (memory game) of playing cards. In each trial, (N + 2) × 2 cards with two-digit numbers were presented (i.e., in the seventh level, 18 cards with two-digit numbers were presented). These cards included (N + 2) pairs of the same two-digit numbers) (in seven levels, there were two pairs with the number “02,” two with “11,” two with “45,” etc.). The subjects could turn over two cards at once and had to remember the digit on each card. If the two cards turned over at once had the same number, the pair was counted as a correct answer, and the pair disappeared from the screen. If the subject removed all the cards in this manner, the trial ended. When the subject turned over cards with different numbers and at least one had already been turned over, the unpaired cards were counted as a wrong answer. This means that the subject would turn over cards of the same number at once, either by luck or by relying on memory. However, if one relied on only luck to get the correct pair, wrong answers would accumulate. If the net correct answer score (correct answers − wrong answers) was higher than 0.85, the task level increased in the next trial; if it was lower than 0.65, the task level decreased in the next trial. Otherwise, the task level did not change. The scheme of this task is presented in Fig. 3.

3) Devilish Mice. In this task, a 3 × 4 grid of cards was presented on the screen. The 12 places on the grid included N hidden mice for the Nth level. In other words, if the task level was three, three mice were hidden in 12 places. During the task, the subjects had to follow the mice as they were shuffled in and out of the grid of cards and select their location when the cards stopped moving. At each level of N, there were normal levels, in which mice moved relatively slowly, and fast levels, in which mice moved relatively faster. Two trials became pairs (two trials were treated as one set). When the subjects found all the mice without errors in both the trials in a pair (in two out of two trials in one set or pair), the trial was considered correct. When the subjects answered correctly in both the trials in a pair, the task level was increased; when they answered correctly in one of the trials in a pair (in two trials in one set), the task level did not change. When the subjects did not answer correctly in either of the trials in a pair (in two out of two trials in one set or pair), the task level was decreased. The scheme of this task is presented in Fig. 3.

4) Devilish Shapes. This task was an N-back task. The stimuli were visual symbols of various shapes. The subjects answered by selecting three choices presented on the 3DS lower screen. Performance evaluation and adjustments in difficulty and speed were the same as those in the Devilish Calculations task.

5) Devilish Blocks. This task was a visuospatial WM task. In each trial, six blocks were presented at once in a spatially random manner N (level) times, at a pace of once per second. For each presentation, one of the six blocks disappeared. The subjects had to remember the order and placement of the blocks that disappeared. After all the blocks were presented, they had to remember and indicate the location and order of the presented stimuli by clicking on the screen. Two trials became pairs (two trials were treated as one set). When the subjects could correctly point out the location of blocks without errors in each trial, the trial was considered correct. When they answered correctly in both the trials in a pair (in two out of two trials in one set or pair), the task level was increased; when they answered correctly in one of the trials in a pair (in two trials in one set), the task level did not change. When the subjects could not answer correctly in either of the trials in a pair (in two out of two trials in one set or pair), the task level was decreased. The scheme of this task is presented in Fig. 3.

6) Devilish Cups. In this task, cups with the numbers 1 to N were initially presented, with as many cups as the level of the task. For example, in the fourth level, four cups, with each cup numbered 1, 2, 3, and 4, were presented. The numbers were hidden under the cups and the cups changed position many times. When the cups stopped moving, the subjects had to remember the placement of each number. For each level of N, there were fast levels in which the cups moved relatively quickly and normal levels in which the cups moved relatively slowly. Two trials were treated as one set. When the subjects identified all numbers hidden under the cups without errors in each trial, the trial was considered correct. When they answered correctly in both trials in a pair (in two out of two trials in one set or pair), the task level was increased; when they answered correctly in one of the trials in a pair (in two trials in one set), the task level did not change. When the subjects could not answer correctly in either of the trials in a pair (in two out of two trials in one set or pair), the task level was decreased. The scheme of this task is presented in Fig. 3.

7) Devilish Listening. This task was the same as the Devilish Calculations task, except that audio stimuli were presented.

**References**

[1] J. W. Kim, D. Y. Lee, E. H. Seo et al., "Improvement of dementia screening accuracy of mini-mental state examination by education-adjustment and supplementation of frontal assessment battery performance," *Journal of Korean Medical Science*, vol. 28, no. 10, pp. 1522-1528, 2013.

[2] J. Raven. Manual for Raven's progressive matrices and vocabulary scales. Oxford: Oxford Psychologists Press; 1998.

[3] H. Takeuchi, Y. Taki, Y. Sassa et al., "White matter structures associated with creativity: Evidence from diffusion tensor imaging," *Neuroimage*, vol. 51, no. 1, pp. 11-18, 2010.

[4] R. Nouchi, Y. Taki, H. Takeuchi et al., "Brain training game improves executive functions and processing speed in the elderly: a randomized controlled trial," *PLoS ONE*, vol. 7, no. 1, pp. e29676, 2012.

[5] T. Hatta, Y. Ito, and K. Yoshizaki. D-CAT manual (Screening test for attention). Osaka: Union Press; 2000.

[6] D. Wechsler. Wechsler adult intelligence scale. New York: The Psychological Corporation 1997.

[7] Society_For_Creative_Minds. Manual of S-A creativity test. Tokyo, Japan: Tokyo shinri Corporation; 1969.

[8] H. Takeuchi, Y. Taki, Y. Sassa et al., "Regional gray matter volume of dopaminergic system associate with creativity: Evidence from voxel-based morphometry " *Neuroimage*, vol. 51, no. 2, pp. 578-585, 2010.

[9] H. Takeuchi, Y. Taki, Y. Sassa et al., "Regional gray matter volume of dopaminergic system associate with creativity: Evidence from voxel-based morphometry," *Neuroimage*, vol. 51, no. 2, pp. 578-585, 2010.

[10] H. Takeuchi, H. Tomita, Y. Taki et al., "The associations among the dopamine D2 receptor Taq1, emotional intelligence, creative potential measured by divergent thinking, and motivational state and these associations' sex differences," *Frontiers in psychology*, vol. 6, pp. Article 912, 2015.

[11] M. F. Folstein, S. E. Folstein, and P. R. McHugh, "“Mini-mental state”: a practical method for grading the cognitive state of patients for the clinician," *Journal of Psychiatric Research*, vol. 12, no. 3, pp. 189-198, 1975.

[12] H. Takeuchi, A. Sekiguchi, Y. Taki et al., "Training of Working Memory Impacts Structural Connectivity," *Journal of Neuroscience*, vol. 30, no. 9, pp. 3297-3303, 2010.
